# Supplementary material for: From lidar scans to roughness maps for wind resource modeling inforested areas
Source: Copernicus journal article supplement (doi:10.5194/wes-2018-10), 2018-02-12
Supplement: Supplementary file [file wes-2018-10-RC1-supplement.pdf]

## **From lidar scans to roughness maps for wind resource modeling in forested areas**

**by Floors et al.**

The paper presents different ways of taking surface roughness and tree height into account when using WASP.

I think it's an interesting paper and I recommend that it should be accepted.

Some detailed comments are given below.

p. 2, line 20 Reads *driven by lines of roughness change lines*. Is this correct?

p. 7, Table 3 What is the relation between *Equivalent Roughness Length (m)* and  $z_0$  in Eq. 1?

p. 3, line 3, typo It reads *height was used, therefore, the displacement*

p. 8, bottom, typo It reads *testing the different as the*

p. 9, line 15, typo It reads *had their roughness was set to 0.1 m*

p. 9, below eq. 2 It reads *the forest height was used to 20 calculate a zero-plane displacement height  $d$* . I don't understand. Why is the displacement height related to the tree height?
